# Supplementary material for: Transcriptional Activation of Chac1 and Other Atf4-Target Genes Induced by Extracellular l-Serine Depletion is negated with Glycine Consumption in Hepa1-6 Hepatocarcinoma Cells
Source: PubMed Central journal article supplement (PMC7600170; doi:10.3390/nu12103018), 2020-10-02
Supplement: nutrients-12-03018-s001.pdf [file nutrients-12-03018-s001.pdf]

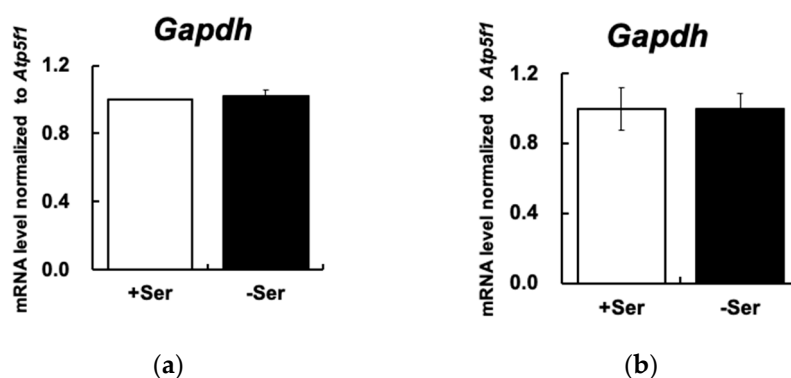

**Figure S1.** The expression levels of *Gapdh* mRNA were not significantly altered between Ser-supplemented and Ser-depleted in Hep1-6 cells. Hepa1-6 were cultured for 6 h and 24 h under the L-Ser-depleted or -supplemented condition, and *Gapdh* mRNA levels were measured cultured for 6 h (a) and for 24h (b). *Gapdh* mRNA level were normalized by *Atp5f1* as the internal control. Student's t-test.
